1 **Processing cookies formulated with goat cream enriched with**  
2 **conjugated linoleic acid**

3

4 Ana C.S. Costa<sup>a\*</sup>, Diego E. Pereira<sup>a</sup>, Caio M. Veríssimo<sup>a</sup>, Marcos A. D. Bomfim<sup>b</sup>, Rita C.R.E.

5 Queiroga <sup>a,c</sup>, Marta S. Madruga<sup>a</sup>, Susana Alves<sup>d</sup>, Rui J.B. Bessa<sup>d</sup>, Maria E.G. Oliveira<sup>a,c</sup>,

6 Juliana K.B. Soares<sup>a</sup>

7

8 <sup>a</sup> Program of Food Science and Technology, Universidade Federal da Paraíba, João Pessoa,

9 Brazil

10 <sup>b</sup> Embrapa Goats and Sheep, Sobral, Brazil

11 <sup>c</sup> Laboratory of Bromatology, Department of Nutrition, Universidade Federal da Paraíba, João

12 Pessoa, Brazil

13 <sup>d</sup> University of Lisbon, Faculty of Veterinary Medicine, Lisbon, Portugal

14 <sup>e</sup> Department of nutrition, Universidade Federal de Campina Grande, Cuité, Brazil

15

16 \*corresponding author

17 E-mail: [acarolinasc@hotmail.com](mailto:acarolinasc@hotmail.com)

18

19 These authors also contributed to this work.

20

21

22

## 23 **Abstract**

24           Goat fat is one of the most important sources of conjugated linoleic acid (CLA), a fatty  
25 acid which has health benefits. However, CLA consumption is limited to meats and milk  
26 products as CLA is generated in ruminants. This study aimed to replace vegetable fat by goat  
27 cream enriched with CLA. Four cookie recipes were developed with only the fat source being  
28 different: CVF – vegetable fat; CB – butter; CGC – goat cream without CLA; CGCLA – goat  
29 cream with CLA. Cookies were evaluated according to physical (color and texture) and  
30 physical-chemical parameters (lipids, proteins, total sugars, fiber, ash, moisture and Aw),  
31 Consumer Testing (n = 123) and lipid profile. The CGCLA presented higher values in the color  
32 parameters, and the higher and the lower scores in relation to hardness were 5.54 (CB) and 2.21  
33 (CVF), respectively. Lipids and total sugars varied inversely, and the highest percentages of  
34 lipids were in the CVF and CG samples, which obtained lower total sugar content. There was  
35 no difference in the acceptance and preference of the four formulations, and the formulations  
36 with the goat creams (CG and CGCLA) were as accepted as CFV. The lipid profile of the  
37 cookies presented CFV with the highest percentage of trans fatty acids (TFA) with 16.76 %.  
38 CGCLA presented 70 % more CLA in relation to CB and CGC, thus certifying that CLA was  
39 present in relevant quantities in the CGCLA, even after cooking. The CGCLA is a biscuit with  
40 higher levels of CLA, and in this study it was possible to verify that the goat milk cream  
41 enriched with CLA can be used in producing cookies which adds functional and nutritional  
42 properties to them and offers other alternatives to produce food from goat's milk cream.

43

44 **Keywords:** Goat milk, biscuits, rumen trans fatty acid.

45

46

47

## 48 **Introduction**

49           The trans-industrial fatty acids (TFA) present in hydrogenated vegetable fat are  
50 associated with adverse health impacts, particularly on changes in the lipoprotein profile in  
51 blood plasma which are directly related to cardiovascular diseases and other non-chronic  
52 diseases communicable diseases (CNCD). Trans-rumen fatty acids (TFAR) are the TFA formed  
53 by the biohydrogenation process of linoleic and linolenic acids in ruminants, and by the  
54 enzymatic action of  $\Delta 9$  -desaturase on vaccinic acid such as conjugated linoleic acid (CLA)  
55 [1]. CLA is scientifically known as having functional anti-carcinogenic, anti-obese, abdominal  
56 fat reducing, anti-atherogenic and immunomodulatory properties [2, 3].

57           Due to TFAR production occurring in ruminants, CLA is characteristic of these animals  
58 and is found in the lipids fraction of its milk or meat. Caprine fat is one of the main sources of  
59 CLA, in addition to having other physiological benefits such as lowering cholesterol levels  
60 without altering triglycerides, HDL, TGO or TGP levels, inducing neurodevelopment stimulus,  
61 reducing anxiety and reducing intestinal inflammation in rats [4-6].

62           Hydrogenated vegetable fat is used industrially in most bakery and confectionery  
63 products such as biscuits and cookies, and the use of this fat is associated with the  
64 physicochemical and technological properties of food such as texture, plasticity and high  
65 melting point [7, 8]. Due to these characteristics of industrial trans fats, it is a challenge to  
66 develop products such as biscuits, and especially those rich in fat as cookies are, using other  
67 lipid sources. Cookies are biscuits that have high levels of sugar and fat and low levels of water  
68 (1-5%), and can be elaborated from different flavors [9, 10].

69           In this context, the objective of this work was to develop cookie type biscuits elaborated  
70 from the caprine cream enriched with CLA, aiming to obtain an alternative matrix for the  
71 consumption of this TFAR which is only found in dairy and meat products.

72

## 73 **Material and methods**

### 74 **Material**

75           The samples of goat's milk cream were supplied by the Brazilian Agricultural Research  
76 Company of goats and sheep, Sobral - CE. The production of enriched CLA cream was enabled  
77 by manipulating the diet of the animals with the addition of soybean oil by EMBRAPA [11]. The  
78 other ingredients used in the cookie formulations were purchased from markets in Joao Pessoa-  
79 PB and Recife-PE.

80

### 81 **Lipid profile of fats**

82           Samples of fats (VF, vegetable fat, B, butter, G, goat cream, and GCLA, goat cream  
83 enriched with CLA) were analyzed for their lipid profiles. The procedure of transesterification  
84 of the samples was performed according to Sukhija and Palmquist (1988) and Palmquist and  
85 Jenkins (2003), with adaptations [12. 13]. The fatty acids were analyzed according to methyl  
86 esters by gas chromatography with flame ionization detection (GC-FID), using a QP2010-plus  
87 Shimadzu chromatograph (Shimadzu, Kyoto, Japan) equipped with a silica-fused (SP-2560,  
88 100 m × 0.25 mm × 0.20 µm, Supelco, Bellefonte, PA, USA).

89           During the analysis, the injector and detector were maintained at 250°C and 280°C,  
90 respectively. Helium was used as the entrainment gas at a constant flow rate of 1 ml/min and 1  
91 µl of sample was injected. The oven temperature was programmed to start at 50°C, then  
92 increased by 50°C every minute until it reached 150°C, remaining for 20 minutes, next  
93 increased by 1°C every minute until it reached 190°C for 1 minute, then increased 2°C every  
94 minute until reaching 220°C, and finally remaining at 220°C for 30 minutes. The identified fatty  
95 acids were express as percentages and are shown in Table 1.

96

97 **Table 1. Fatty acid profile present in fats in percentage.**

| <b>FATTY ACIDS</b>     | <b>VF<sup>a</sup></b> | <b>B<sup>b</sup></b> | <b>G<sup>c</sup></b> | <b>NCLA<sup>d</sup></b> |
|------------------------|-----------------------|----------------------|----------------------|-------------------------|
| <b>SATURATED</b>       |                       |                      |                      |                         |
| C4:0                   | -                     | 3,32                 | 2,29                 | 2,61                    |
| C6:0                   | -                     | 2,06                 | 2,75                 | 2,27                    |
| C8:0                   | 0,01                  | 1,19                 | 3,27                 | 1,84                    |
| C10:0                  | 0,01                  | 2,58                 | 11,14                | 5,28                    |
| C12:0                  | 0,07                  | 2,98                 | 4,37                 | 1,95                    |
| C14:0                  | 0,13                  | 10,91                | 10,15                | 6,14                    |
| C15:0                  | 0,02                  | 1,92                 | 1,38                 | 1,01                    |
| C16:0                  | 12,77                 | 31,01                | 25,55                | 21,01                   |
| C17:0                  | 0,03                  | 1,43                 | 1,09                 | 0,97                    |
| C18:0                  | 11,20                 | 11,32                | 12,13                | 21,20                   |
| C20:0                  | 0,39                  | 0,15                 | 0,29                 | 0,37                    |
| C21:0                  | 0,03                  | 0,03                 | 0,04                 | 0,04                    |
| C22:0                  | 0,44                  | 0,06                 | 0,07                 | 0,11                    |
| C23:0                  | 0,05                  | 0,03                 | 0,02                 | 0,02                    |
| C24:0                  | 0,16                  | 0,05                 | 0,03                 | 0,02                    |
| <b>TOTAL SFA</b>       | <b>25,32</b>          | <b>69,01</b>         | <b>75,41</b>         | <b>64,81</b>            |
| <b>MONOUNSATURATED</b> |                       |                      |                      |                         |
| C14:1C9                | -                     | 0,94                 | 0,11                 | 0,05                    |
| C16:1C7                | 0,01                  | 0,23                 | 0,27                 | 0,29                    |
| C16:1C9                | 0,06                  | 1,38                 | 0,41                 | 0,31                    |
| C17:1C9                | 0,01                  | 0,26                 | 0,16                 | 0,10                    |
| C18:1T6+T8             | 3,98                  | 0,26                 | 0,16                 | 0,52                    |

|                        |       |             |             |             |
|------------------------|-------|-------------|-------------|-------------|
| C18:1T9                | 3,04  | 0,19        | 0,14        | 0,46        |
| C18:1T10               | 7,90  | 0,26        | 0,16        | 0,45        |
| C18:1T11               | 4,81  | 1,90        | 0,65        | 4,45        |
| C18:1T12               | 3,31  | 0,26        | 0,17        | 0,60        |
| C18:1C9                | 30,86 | 21,41       | 19,21       | 22,79       |
| C18:1T15               | 1,60  | 0,18        | 0,10        | 0,35        |
| C18:1C11               | 2,25  | 0,44        | 0,30        | 0,34        |
| C18:1C12               | 8,90  | 0,13        | 0,09        | 0,24        |
| C18:1C13               | 0,46  | 0,06        | 0,02        | 0,05        |
| C18:1T16+C14           | 0,47  | 0,30        | 0,18        | 0,48        |
| C18:1C15               | 0,44  | 0,10        | 0,03        | 0,09        |
| C20:1                  | 0,16  | 0,04        | 0,04        | 0,06        |
| TOTAL MUFA             | 67,80 | 28,27       | 22,15       | 31,57       |
| <b>POLYUNSATURATED</b> |       |             |             |             |
| C18:2N6                | 6,22  | 1,16        | 1,56        | 1,52        |
| C18:3N-6               | -     | 0,02        | 0,02        | 0,01        |
| C18:3N3                | 0,20  | 0,40        | 0,22        | 0,14        |
| <b>CLAC9T11</b>        | -     | <b>0,87</b> | <b>0,34</b> | <b>1,69</b> |
| C20:3N-6               | -     | 0,04        | 0,02        | 0,01        |
| C20:4N-6               | -     | 0,08        | 0,16        | 0,13        |
| C20:5N-3               | -     | 0,03        | 0,02        | 0,01        |
| C22:5N-3               | -     | 0,06        | 0,05        | 0,04        |
| C22:6N-3               | -     | 0,01        | 0,02        | 0,03        |
| TOTAL PUFA             | 6,42  | 2,66        | 2,43        | 3,58        |
| <b>TRANS</b>           | 25,11 | 3,34        | 1,54        | 7,31        |

98

99 <sup>a</sup> VF: vegetable fat; <sup>b</sup> B: butter, <sup>c</sup> G: goat cream; <sup>d</sup> GCLA: goat cream with CLA, expressed as a  
100 percentage.

101

## 102 **Cookie production**

103 Four formulations of cookies were developed by only varying the fat source between  
104 each of them, being CVF - vegetal fat; CB - butter; CG - goat cream without enrichment of  
105 CLA; CGCLA - goat cream with CLA enrichment. Preliminary tests were carried out until the  
106 ideal formulations were determined before the final composition of the cookies. The inputs and  
107 quantities used are describe in Table 2. After preparation, the cookies were baked for 15 minutes  
108 at 165°C in a conventional oven.

109

110 **Table 2. Ingredients used in the formulations of cookies for 100 g of fresh dough.**

| Ingredients (g)                               | Cookies          |                 |                 |                    |
|-----------------------------------------------|------------------|-----------------|-----------------|--------------------|
|                                               | CVF <sup>a</sup> | CB <sup>b</sup> | CG <sup>c</sup> | CGCLA <sup>d</sup> |
| Maize starch                                  | 17,84            | 17,84           | 17,84           | 17,84              |
| Rice flour                                    | 11,74            | 11,74           | 11,74           | 11,74              |
| Vegetable fat                                 | 18,78            | -               | -               | -                  |
| Butter                                        | -                | 18,78           | -               | -                  |
| Goat cream<br>whitout<br>enrichment of<br>CLA | -                | -               | 18,78           | -                  |
| Goat cream<br>with enrichment<br>of CLA       | -                | -               | -               | 18,78              |
| Brown sugar<br>mascavo                        | 18,78            | 18,78           | 18,78           | 18,78              |

|                 |       |       |       |       |
|-----------------|-------|-------|-------|-------|
| Chestnut        | 11,74 | 11,75 | 11,74 | 11,74 |
| Raisin          | 9,4   | 9,4   | 9,4   | 9,4   |
| Egg             | 9,4   | 9,4   | 9,4   | 9,4   |
| Xanthan gum     | 0,47  | 0,47  | 0,47  | 0,47  |
| Cinnamon powder | 0,24  | 0,24  | 0,24  | 0,24  |
| Clove powder    | 0,24  | 0,24  | 0,24  | 0,24  |
| Yeast chemical  | 0,94  | 0,94  | 0,94  | 0,94  |
| Salt            | 0,47  | 0,47  | 0,47  | 0,47  |

111 <sup>a</sup> CVF - vegetable fat; <sup>b</sup> CB - butter; <sup>c</sup> CG - goat cream; <sup>d</sup> CGCLA - goat cream with CLA.

112

113

## 114 **Physical analyses**

### 115 **Instrumental color**

116 Determination of the cookies' instrumental color was performed in a CR-300 Minolta  
117 colorimeter (MinoltaCo., Osaka, Japan) according to the CIE-lab system [14]. In the CIELAB  
118 colorimetric space defined by L\*, a\*, b\*, the L\* coordinate corresponds to the brightness,  
119 ranging from 0 (black) to 100 (white), while a\* and b\* refer to the green (-) chromaticity  
120 coordinates/red (+) and blue (-)/yellow (+), respectively. The measurements were performed  
121 with the apparatus previously calibrated in the reflectance modality with specular reflection  
122 excluded and using reference plates. A colon at the top of the cookies was for the measurement  
123 and then a dot at the bottom.

124

### 125 **Instrumental texture**

126 Determination of the cookies' texture was performed in a TA XT Plus texturometer  
127 from Extralab Brazil. The data obtained were analyzed by StableMicroSystems



128 software/TE32L/Version 6.1.4.0, England. Each sample was placed horizontally on the  
129 platform and cut in half with a blade probe (HDP/3PB), pre-test speed of 1 mm/s and 3 mm/s,  
130 and a post-test speed of 10 mm/s, sheer force of  $5 \times 10^{-3}$  g and 5.0 mm distance, with the force  
131 of rupture or breaking (hardness) being recorded.

132

## 133 **Physicochemical Analysis**

### 134 **Proteins, lipids, total sugars, fibers, ashes and moisture**

135 The centesimal composition was determined according to the methodology described  
136 by the Association of Official Analytical Chemist Methods [15]. The following tests were  
137 carried out: the micro-Kjedahl method, total sugars by the Fehling reduction, the fibers by  
138 Henneberg and Stohmann; moisture and total dry extract (EST) by drying in an oven stabilized  
139 at 105° C until obtaining constant weight; determination of ash content by carbonization  
140 followed by incineration in a muffle furnace at 550° C; determination of lipids by Folch, Lees,  
141 and Stanley (1957); and water activity was performed at 25° C in Aqualab® [16].

142

### 143 **Sensory evaluation**

144 The sensorial tests were performed after approval by the Research Ethics Committee of  
145 the Health Sciences Center of the Federal University of Paraiba, under reference number  
146 052900/2015. For Sensory Analysis, the Acceptance, Intention of Purchase and Ordering tests  
147 were performed by 123 untrained judges, being 76.42 % women and 23.57 % men. The samples  
148 were coded with random 3-digit numbers and served in plastic containers in a comparative way,  
149 in complete and balanced blocks. In addition to the samples, each evaluator received a glass  
150 with water to clean their palate during the evaluation. The tests were conducted at the Mauricio  
151 de Nassau Faculty (Joao Pessoa) and the Federal University of Paraiba, Joao Pessoa campus,

152 both in the Dietetic Technique laboratory of each institution. The judges were between the ages  
153 of 18 and 61 and were in perfect health.

154 The judges received a sheet through which they evaluated each sample according to the  
155 attributes of appearance, color, aroma, flavor, texture and overall evaluation using a hedonic  
156 scale of 9 points, where 9 would be the maximum score represented by "I liked it very much",  
157 and 1 is the minimum grade, representing "very disgusting", containing intermediate points  
158 between these values. For purchase intent, participants responded to a 5-point scale expressing  
159 their willingness to consume, to buy or not buy the product offered to them, where terms were  
160 defined between "likely to buy" with a score of 5, and "probably would not buy" with a score  
161 of 1, and "maybe I would buy" at the intermediate point with a score of 3.

162 For the Ordination test carried out together with the Acceptance and Purchase Intention  
163 test, the judges were instructed to place the samples in ascending order according to their  
164 preference, with 1<sup>st</sup> place being the most preferred and 4<sup>th</sup> place the least preferred. Sensory  
165 tests were performed according to Dutcosky (2013) [17].

166

## 167 **Lipid profile of cookies**

168 The samples of the cookies elaborated with different lipid sources (CVF - vegetable fat;  
169 CB - butter; CG - goat cream; CGCLA - goat cream with CLA) were analyzed for their lipid  
170 profiles. The transesterification procedure of the samples was carried out according to Sukhija  
171 and Palmquist (1988) and Palmquist and Jenkins (2003), with adaptations [12. 13]. The fatty  
172 acids were analyzed according to methyl esters by gas chromatography with flame ionization  
173 detection (GC-FID) using a QP2010-plus Shimadzu chromatograph (Shimadzu, Kyoto, Japan)  
174 equipped with a silica-fused (SP-2560, 100 m × 0.25 mm × 0.20 µm, Supelco, Bellefonte, PA,  
175 USA). During the analysis the injector and detector were maintained at 250°C and 280°C,  
176 respectively. Helium was used as the entrainment gas at a constant flow rate of 1 ml/min and 1

177  $\mu\text{l}$  of sample was injected. The oven temperature was programmed to start at 50°C, then  
178 increased by 50°C every minute until it reached 150°C, remaining for 20 minutes, and next  
179 increased by 1°C every minute until it reached 190°C and remained for 1 minute, and then  
180 increased 2°C every minute until reaching 220°C, and finally remaining at 220°C for 30 minutes.  
181 The identified fatty acids were express as percentages and are shown in Table 1.

182

## 183 **Statistical analyses**

184 The analysis data were submitted to analysis of variance (ANOVA) followed by Tukey  
185 test to verify if there was a significant difference between the samples, considering  $p < 0.05$  and  
186 using Sigma Stat 3.1 software [18]. The results of the sensory order-preference tests were  
187 analyzed according to the Friedman test using the Newell MacFarlane Table [19]. Physical and  
188 physico-chemical analyzes were performed in triplicate. All data sets were submitted to  
189 Principal Component Analysis (PCA) using correlation matrix and Statistica 7.0 software  
190 (Statsoft Inc., Tulsa, OK, USA).

191

## 192 **Results and discussion**

### 193 **Physical analyzes**

#### 194 **Color**

195 The color data are shown in Table 3. Values of  $L^*$  above 50 tend to be lighter in color  
196 as observed herein. Only the CB presented a difference in relation to the other formulations,  
197 with the lowest value (55.66), while the other treatments ranged from 58.34 (CGCLA), to 57.68  
198 (CG) and 57.66 (CVF). Extreme values of  $L^*$  may interfere with sensory perception, since they  
199 are either too dark or too light. The increase in the parameter  $a^*$  and decrease in  $L^*$  indicate the  
200 progress of the darkening, however this darkening associated to the increase of  $a^*$  and decrease  
201 of  $L^*$  was not observed in cookies [20].

202

203 **Table 3. Physical parameters of cookies with different lipid sources.**

| Variable            | Cookies                  |                           |                          |                          |
|---------------------|--------------------------|---------------------------|--------------------------|--------------------------|
|                     | CVF                      | CB                        | CG                       | CGCLA                    |
| <b>L</b>            | 57,66 <sup>a</sup> ±0,87 | 55,66 <sup>b</sup> ±0,66  | 57,68 <sup>a</sup> ±0,99 | 58,34 <sup>a</sup> ±0,91 |
| <b>a*</b>           | 14,05 ±0,76              | 14,44 ±0,54               | 14,29 ±0,84              | 14,21 ±0,95              |
| <b>b*</b>           | 29,47 <sup>c</sup> ±0,91 | 30,57 <sup>ab</sup> ±0,99 | 29,76 <sup>b</sup> ±0,95 | 30,89 <sup>a</sup> ±0,94 |
| <b>Texture (Kg)</b> | 2,21 <sup>c</sup> ±0,45  | 5,54 <sup>a</sup> ±0,66   | 4,41 <sup>b</sup> ±0,42  | 4,05 <sup>b</sup> ±0,48  |

204 Means ± standard deviation with different letters on the same line differed by Tukey's test ( $p < 0.05$ ).

205 CVF - vegetable fat; CB - butter; CG - goat cream; CGCLA - goat cream with CLA.

206

207 The parameter a\* presented no significant difference ( $p > 0.05$ ), however it did obtain  
208 positive values which are associated with red pigments, since the parameter b\* obtained a  
209 significant difference between the formulations; furthermore, the values were positive, being  
210 related to yellow pigments. According to Marques (2016), positive values of a\* and b\* are  
211 expected in cakes, since they present red and yellow pigments, respectively, due to the  
212 caramelization reactions of sugars and Maillard [21].

213 The Maillard reaction is an interaction between sugars and amino acids, and together  
214 with the caramelization reaction of sugars produce brown pigments during the cooking process,  
215 which are associated with luminosity, and more red and yellow staining [22].

216 The variation in L\* and b\* did not interfere in the sensorial perception of the appearance  
217 and color (Table 5), as will be presented in the subitem "Consumer Test". According to Sharma  
218 and Gurjral (2013), browning reactions are influenced by other factors such as moisture, water  
219 activity, pH, sugars, type and proportion of starch, cooking time and temperature [23].

220

221

## 222 **Instrumental texture**

223           The cookies' hardness (evaluated by the instrumental method) is proportional to the  
224 force applied to cause deformation. This strength varies according to the composition (quality  
225 and quantity of flour, sugars, fats, liquids and other ingredients), cooking time and temperature,  
226 humidity, and storage conditions. Hardness is one of the factors that is associated with texture  
227 to determine the acceptability of foods, so it is desirable that their values are not very high [24].  
228 The values of the instrumental texture are presented in Table 3.

229           The CB formulation presented the highest hardness value (5.54 kg) and CFV presented  
230 the lowest value (2.21 kg). The CG and CGCLA formulations presented values of 4.41 kg and  
231 4.05 kg, respectively ( $p > 0.05$ ). These data demonstrate that the cookies made with the goat  
232 cream independent of the CLA content did not differ statistically from each other. An extreme  
233 increase of hardness as very soft or very hard can sensorially interfere in the products. Fragile  
234 and crunchy foods are known to have irregular and irreproducible relationships with the force  
235 versus deformation relationship [25].

236           The results obtained in the present study were similar to that of the control group (C).  
237 The results showed that the order of hardness was  $MGCO > C > GCO$ , and with the addition of  
238 oil (GCO) or microencapsulated oil (MGCO), the acceptance was  $C > MGCO > GCO$ , with the  
239 most accepted sample being that which obtained an intermediate degree of hardness [26].  
240 According to Bertolin (2013), high values in texture negatively influence the overall acceptance  
241 of cookies. In the present work, this relationship of hardness with acceptance was not observed,  
242 considering that there was no significant difference in the sensory perception of texture (Table  
243 5) [27]. Regarding hardness, the order was  $CB > CG = CGCLA > CFV$  (Table 3).

244

245

246

## 247 **Physico-chemical analysis**

248 The physicochemical data are shown in Table 4, in which CVF and CB presented the  
249 highest lipid percentages with 28 % and 25.8 %, respectively. The fact that CVF and CB have  
250 higher lipid levels is related to the lower percentages of sugars and moisture. A correlation of  
251 the fat processing with the lipid content variation of the cookies can be made, since the cream  
252 is the emulsion of fat in water and the lipid content can vary from 12 to 60 %, since other  
253 elements like sugars can pass next to the fat globules in the milk skimming. Unlike the cream,  
254 the butter should contain a minimum percentage of 80 % lipids, and the hydrogenated vegetable  
255 fat is composed of 100 % lipids [28].

256

257 **Table 4 – Physico-chemical parameters of cookies made with different lipid sources.**

| Variable            | Cookies                   |                           |                           |                           |
|---------------------|---------------------------|---------------------------|---------------------------|---------------------------|
|                     | CVF                       | CB                        | CG                        | CGCLA                     |
| <b>Lipids</b>       | 28,00 <sup>a</sup> ± 0,00 | 25,80 <sup>b</sup> ± 0,66 | 21,16 <sup>c</sup> ± 0,24 | 20,86 <sup>c</sup> ± 0,68 |
| <b>Proteins</b>     | 5,43 ± 0,25               | 5,50 ± 0,32               | 5,90 ± 0,08               | 5,79 ± 0,30               |
| <b>Total Sugars</b> | 51,38 <sup>c</sup> ± 0,32 | 54,42 <sup>b</sup> ± 0,36 | 56,38 <sup>a</sup> ± 0,33 | 55,02 <sup>b</sup> ± 0,12 |
| <b>Fibers</b>       | 0,24 ± 0,01               | 0,25 ± 0,01               | 0,26 ± 0,01               | 0,25 ± 0,00               |
| <b>Ashes</b>        | 1,61 ± 0,24               | 1,70 ± 0,16               | 1,63 ± 0,27               | 1,59 ± 0,28               |
| <b>Humidity</b>     | 4,39 <sup>c</sup> ± 0,29  | 4,64 <sup>c</sup> ± 0,22  | 6,52 <sup>a</sup> ± 0,23  | 5,35 <sup>b</sup> ± 0,07  |
| <b>Aw</b>           | 0,35 <sup>b</sup> ± 0,47  | 0,43 <sup>ab</sup> ± 0,03 | 0,53 <sup>a</sup> ± 0,17  | 0,47 <sup>ab</sup> ± 0,26 |

258 Averages ± standard deviation with different letters on the same line differed by Tukey's test  
259 (p<0.05). CVF - vegetable fat; CB - butter; CG - goat cream; CGCLA - goat cream with CLA.

260

261           The humidity and  $A_w$  presented significant differences, with CG and CGCLA having  
262 the highest humidity values with 6.25 % and 5.35%, respectively, and CG had the highest  $A_w$   
263 (0.53). These higher percentages can be associated with the characteristic of the lipids used in  
264 these formulations (Table 1), as previously mentioned. These variations may occur because  
265 other elements such as diversity and type of ingredients, cooking time and temperature directly  
266 interfere with moisture and  $A_w$ . Protein, fiber and ash contents did not vary significantly  
267 between formulations.

268           In the case of oatmeal-rich biscuits, the water content of the oatmeal oil was similar to  
269 that of oysters. According to Chung, Cho, and Lim (2014), the moisture of the biscuit cookie  
270 should vary between 2 and 8 g/100 g [29]. Therefore, the four cookie formulations are suitable  
271 for this variation. Foods have a sigmoid relationship with water and  $A_w$ , since the moisture  
272 content and  $A_w$  have a strong effect on the perception of sharpness and the mechanical  
273 sensations of dry and brittle foods as in biscuits [30, 31].

274

## 275 **Sensory evaluation**

276           The evaluation of the mean scores obtained in the sensory analysis (Table 5) showed  
277 that the formulations did not differ significantly between the parameters (appearance, color,  
278 aroma, flavor, texture and overall evaluation) ( $p > 0.05$ ). Despite the use of different types of  
279 fats with different and peculiar characteristics such as goat cream in the preparation of cookies,  
280 these changes were not perceptibly noticeable to the judges. The formulations were only  
281 qualitatively and not quantitatively altered in relation to the fat added to the cookies (Table 1),  
282 although there was a significant difference ( $p < 0.05$ ) in the lipid content of these formulations  
283 (Table 4).

284

285

286 **Table 5. Mean values of sensory acceptance and purchase intention tests.**

| Attribute                 | Cookies                  |                         |                         |                          |
|---------------------------|--------------------------|-------------------------|-------------------------|--------------------------|
|                           | CVF                      | CB                      | CG                      | CGCLA                    |
| <b>Appearance</b>         | 7,47 ±1,36               | 7,35 ±1,43              | 7,46 ±1,45              | 7,32 ±1,38               |
| <b>Color</b>              | 7,62 ±1,18               | 7,37 ±1,32              | 7,41 ±1,40              | 7,40 ±1,29               |
| <b>Aroma</b>              | 6,83 ±1,86               | 6,83 ±1,70              | 7,09 ±1,51              | 6,72 ±1,90               |
| <b>Flavor</b>             | 6,81 ±2,12               | 6,80 ±1,83              | 7,15 ±1,67              | 6,96 ±1,76               |
| <b>Texture</b>            | 7,00 ±1,98               | 7,03 ±1,58              | 7,14 ±1,75              | 7,03 ±1,56               |
| <b>Overall assessment</b> | 7,20 ±1,62               | 7,13 ±1,48              | 7,53 ±1,32              | 7,10 ±1,60               |
| <b>Purchase intention</b> | 3,60 <sup>ab</sup> ±1,30 | 3,52 <sup>b</sup> ±1,22 | 3,96 <sup>a</sup> ±1,11 | 3,67 <sup>ab</sup> ±1,26 |

287 Averages ± standard deviation with different letters on the same line differed by Tukey's test

288 (p<0.05). CVF - vegetable fat; CB - butter; CG - goat cream; CGCLA - goat cream with CLA.

289

290 When developing biscuits formulated with different concentrations of oats and palm  
 291 oil, Bertolin et al. (2013) found that higher concentrations of oats (51 %) and lower  
 292 concentrations of palm oil (8 %) negatively interfered in the sensorial acceptance of this biscuit  
 293 [27]. Similar data regarding the fat content in biscuits were observed by Biguzzi, Schlich and  
 294 Lange (2014) when evaluating the sensorial perception in biscuits with a reduction of different  
 295 concentrations of fats (15 % and 25 %) compared to the standard biscuits, observing that the  
 296 cookies made with lower fat percentage (25 % reduction) obtained sensorial difference in  
 297 relation to the formulation with lower fat reduction and the standard formulation [32].

298 The difference in sensory perception in the reduction of the fat content in cookies was  
 299 observed by Drewnowski, Nordensten and Dwyer (1998), who reported the decrease in the  
 300 acceptance of biscuits with a reduction of 50 % fat; a fact that did not interfere when the  
 301 reduction was 25 % [33].



302           The references mentioned above demonstrate that the amount of fat above a reduction  
303 percentage interferes in the judges' acceptance. However, through this study it was observed  
304 that the variation in fat type could not be perceived by the judges, as there was no interference  
305 in the sensorial acceptance, or a significant difference among the evaluated attributes. Thus, the  
306 use of fats with a better lipid profile such as G and GCLA (Table 1) offers great nutritional and  
307 technological impact, adding value to the cookies without altering their flavor.

308           Among the analyzed attributes, the biscuit elaborated with the goat cream presented  
309 greater intention of purchase, resembling the cookies containing vegetable fat and goat cream  
310 enriched with CLA ( $p < 0.05$ ). In addition, all formulations scored between 4 "I would possibly  
311 buy" and 3 "I would maybe buy/I would maybe not buy," with at least a 50 % chance of  
312 acquiring cookies.

313           According to the Prediction Order Analysis data (Table 6), there was no significant  
314 difference between the four formulations ( $p > .05$ ). The CG and CGCLA samples are as  
315 preferred as the CVF, which was elaborated with VF, and which is more used in the preparation  
316 of biscuits and cookies by industries [34]. These data indicate that cookies can be elaborated  
317 from better sources of fat such as goat cream, which has a better lipid profile (Table 1) and  
318 which brings benefits to consumer health. In addition, the characteristic odors and flavors of  
319 goat origin products were not sensorially perceived when compared to the other formulations.

320

321

322

323

324

325

326

327 **Table 6. Distribution of the scores according to the order of general preference by the**  
328 **tasters (n = 123) in the sensory analysis of cookies.**

| Cookies formulations | Number of testers by order* |    |    |    | Total orders** |
|----------------------|-----------------------------|----|----|----|----------------|
|                      | 1                           | 2  | 3  | 4  |                |
| CVF                  | 32                          | 27 | 22 | 42 | 320            |
| CB                   | 34                          | 36 | 34 | 19 | 284            |
| CG                   | 22                          | 35 | 27 | 39 | 329            |
| CGCLA                | 35                          | 25 | 40 | 23 | 297            |

329 \* 1 = least preferred, 4 = most preferred.

330 \*\* Sum of the orders of each sample = (1 x number of tasters) + (2 x number of tasters) + (3  
331 x number of tasters) + (4 x number of tasters).

332 CGV - Vegetable fat; CM - Butter; Caprine CNCLA - Goat cream enriched with CLA).

333

334 The use of goat cream is a lipid source that can be applied to cookies, thus adding value  
335 and functionality to goat milk derivatives, which are normally used in dairy products. In this  
336 way, the present work will serve as a subsidy for the use of this fat in developing various  
337 confectionery and bakery products.

338

### 339 **Chromatographic analysis of cookies**

340 The fatty acid profiles of the cookies are shown in Table 7. The CB, CG and CGCLA  
341 presented higher percentages of SFA in comparison to the CVF. However, when comparing  
342 CG with CGCLA, it is observed that CGCLA reduced 7.89 % of the SFA, and this reduction is  
343 associated with the addition of soybean oil in the goat diet, which altered the lipid profile of  
344 goat cream [11].

345 **Table 7. Profile of fatty acids present in cookies in percentage.**

| <b>FATTY ACIDS</b>     | <b>CVF<sup>a</sup></b> | <b>CB<sup>b</sup></b> | <b>CN<sup>c</sup></b> | <b>CNCLA<sup>d</sup></b> |
|------------------------|------------------------|-----------------------|-----------------------|--------------------------|
| <b>SATURATED</b>       |                        |                       |                       |                          |
| C4:0                   | 0,01                   | 1,29                  | 1,61                  | 1,86                     |
| C6:0                   | -                      | 1,31                  | 1,87                  | 1,54                     |
| C8:0                   | 0,01                   | 0,76                  | 2,10                  | 1,35                     |
| C10:0                  | 0,02                   | 1,70                  | 6,81                  | 3,57                     |
| C12:0                  | 0,01                   | 1,97                  | 2,65                  | 1,22                     |
| C14:0                  | 0,19                   | 6,86                  | 6,14                  | 3,50                     |
| C15:0                  | 0,04                   | 0,99                  | 0,88                  | 0,62                     |
| C16:0                  | 14,84                  | 26,44                 | 22,93                 | 19,89                    |
| C17:0                  | 0,09                   | 0,77                  | 0,70                  | 0,57                     |
| C18:0                  | 10,07                  | 10,93                 | 11,19                 | 14,85                    |
| C20:0                  | 0,33                   | 0,18                  | 0,25                  | 0,25                     |
| C21:0                  | 0,02                   | 0,01                  | 0,02                  | 0,02                     |
| C22:0                  | 0,31                   | 0,05                  | 0,06                  | 0,08                     |
| C23:0                  | 0,04                   | 0,02                  | 0,02                  | 0,02                     |
| C24:0                  | 0,13                   | 0,03                  | 0,04                  | 0,03                     |
| <b>TOTAL SFA</b>       | <b>26,11</b>           | <b>53,29</b>          | <b>57,26</b>          | <b>49,37</b>             |
| <b>MONOUNSATURATED</b> |                        |                       |                       |                          |
| C14:1C9                | 0,01                   | 0,53                  | 0,07                  | 0,04                     |
| C16:1C7                | -                      | 0,43                  | 0,54                  | 0,74                     |
| C16:1C9                | 0,25                   | 1,02                  | 0,45                  | 0,47                     |
| C17:1C9                | 0,04                   | 0,14                  | 0,11                  | 0,08                     |

|                        |       |       |       |       |
|------------------------|-------|-------|-------|-------|
| C18:1T6+T8             | 2,40  | 0,18  | 0,10  | 0,34  |
| C18:1T9                | 2,23  | 0,13  | 0,10  | 0,32  |
| C18:1T10               | 5,10  | 0,21  | 0,11  | 0,33  |
| C18:1T11               | 3,31  | 0,79  | 0,45  | 2,47  |
| C18:1T12               | 2,11  | 0,20  | 0,12  | 0,33  |
| C18:1C9                | 33,03 | 25,92 | 26,68 | 29,67 |
| C18:1T15               | 1,30  | 0,17  | 0,10  | 0,16  |
| C18:1C11               | 1,79  | 0,61  | 0,55  | 0,62  |
| C18:1C12               | 5,82  | 0,11  | 0,06  | 0,26  |
| C18:1C13               | 0,30  | 0,04  | 0,01  | 0,04  |
| C18:1T16+C14           | 0,30  | 0,18  | 0,11  | 0,26  |
| C18:1C15               | 0,29  | 0,06  | 0,02  | 0,05  |
| C20:1                  | 0,13  | 0,06  | 0,06  | 0,07  |
| TOTAL MUFA             | 58,11 | 30,75 | 29,62 | 36,20 |
| <b>POLYUNSATURATED</b> |       |       |       |       |
| C18:2N6                | 15,20 | 15,17 | 12,18 | 12,93 |
| C18:3N-6               | -     | 0,02  | 0,20  | 0,013 |
| C18:3N3                | 0,181 | 0,25  | 0,20  | 0,17  |
| <b>CLAC9T11</b>        | -     | 0,25  | 0,21  | 0,95  |
| C20:3N-6               | 0,01  | 0,04  | 0,02  | 0,02  |
| C20:4N-6               | 0,07  | 0,13  | 0,21  | 0,16  |
| C20:5N-3               | -     | 0,01  | 0,01  | 0,01  |
| C22:5N-3               | -     | 0,03  | 0,04  | 0,03  |
| C22:6N-3               | 0,02  | 0,03  | 0,04  | 0,12  |
| TOTAL PUFA             | 15,48 | 15,92 | 13,11 | 14,39 |

**TRANS**

16,76

1,87

1,09

4,21

346 <sup>a</sup> CGV (cookie with vegetable fat); <sup>b</sup> CB (cookie with butter); <sup>c</sup> CG (cookie with goat cream);

347 <sup>d</sup> CGCLA (cookie with goat cream enriched with CLA).

348

349

350 It is common for fats of animal origin such as those used in these cookies to be a source of SFA.

351 Palmitic acid was the predominant FA in CB, CB and CGCLA, representing about 20 % of total

352 FA. Capric acid (C10: 0) and caprylic (C8: 0) acids are characteristic of goat fat, being identified

353 in greater proportions in G with 11.14 % and 3.27 %, and in GCLA with 5.28 % and 1.84 %,

354 respectively (Table 1).

355 The decrease of the medium chain fatty acids (MCFAs) (10 to 16 carbons) is

356 associated with the manipulation of the goat diets, since the addition of calcium salts of fatty

357 acids in the goat's feed can present a decrease in the capric and myristic concentration and one

358 an increase in linoleic fatty acids (C18: 2 n6), CLA (C18: 2 c9t11), omega-6 (n-6) and PUFA

359 [35]. In the elaborated cookies in the present research, the decrease of C10: 0 and the increase

360 of CLA were also perceived in both CG and CGCLA. This fat naturally enriched with CLA

361 used in the elaboration of the CGCLA also obtained similar treatment, where the caprine ration

362 was added with soybean oil [11].

363 High consumption of SFA is commonly associated with risk factors for

364 cardiovascular disease. However, they should not be excluded from feeding, since they are

365 necessary for energy synthesis and make up the cell membranes.<sup>36</sup> Short chain saturated fatty

366 acids (4 to 8 carbons) also exert beneficial effects on intestinal health due to rapid uptake and

367 oxidation by colon cells, thereby stimulating cell proliferation in this tissue, as well as playing

368 a role in disease prevention for cardiovascular, cancer and inflammatory diseases [37].

369 The MUFA presented a higher percentage in CGV with 58.11 %, and these values were  
370 related to the TFA, which obtained high percentages when compared to CB, CG and CGCLA.  
371 The iTFA present in vegetable fat are associated with CNCV, since the organism does not have  
372 the capacity to metabolize these compounds, leading to atheromas. The TFA content ranged  
373 from 16.76 % (CVF) to 1.1 % (CG), with CGCLA being the second highest percentage of TFA  
374 with 4.21 %. Although CGCLA showed an increase in TFA when compared to CB and CG,  
375 this change in lipid profile increased in the cookies related to the fat used in its formulation,  
376 which has a higher percentage of essential fatty acids such as CLA.

377 The high percentage of AGV of CGV is related to the lipid profile of GV used in the  
378 elaboration of CGV. The process of vegetable fat hydrogenation increases the percentage of  
379 industrial trans fatty acids (iTFA), with these fatty acids being found in industrialized foods  
380 such as cookies and wafers that use this fat in their composition.<sup>34</sup> When evaluating the  
381 percentages of TFA in processed foods in the Portuguese market, Costa et al. (2016) observed  
382 that Trans-C18: 1 and its isomers were present in higher amounts in these foods.<sup>7</sup>

383 Elaidic acid (C18: 1 trans-9) is the main constituent of iTFA. Oleic acid (C18: 1) is an  
384 MUFA present in oils of vegetable origin. After the hydrogenation process, the oleic acid  
385 changes its spatial and biochemical conformation, forming elaidic acid.<sup>38</sup> These iTFA are  
386 associated with cardiovascular diseases, obesity, and CNCV.<sup>39</sup>

387 The PUFA percentage did not have much quantitative variation, with the highest  
388 percentage of CVF (15.48 %) and the lowest of CG (13.10 %); however, the lipid profile  
389 qualitatively differs between formulations. Among the PUFA, CGCLA and CG presented  
390 higher percentages of docosahexaenoic acid (DHA) (C22: 6n-3), which is associated with  
391 cardio-protective effect, neurological development, and anti-inflammatory properties.<sup>26</sup>

392 Another essential PUFA is CLA (C18: 2 c9t11), which was only present in ruminant fat,  
393 since isomerization and biohydrogenation of linoleic acid (C18: 2) and linolenic acid (C18: 3)

394 only occur in rumen or mammary glands of these animals. Meat or dairy products are the main  
395 source of consumption of these TFAr [40, 41].

396 This natural transfat derived from ruminants exerts functional health properties such as  
397 plasma antioxidant activity, antimutagenic and anticarcinogenic action, acting in the reduction  
398 of cytotoxic agents in cancer cells. In addition, CLA triggers immune response stimuli against  
399 atherosclerosis, diabetes mellitus and obesity prevention [3, 42].

400 After the preparation of the cookies, there was a reduction in CLA contents of 74 %  
401 compared to fat enriched with CLA before cooking. This loss occurred in all cookies containing  
402 CLA, however, the CGCLA still maintained a higher content of 70 % of this fatty acid  
403 compared to the others. Therefore, the cookie with caprine enriched with CLA is an alternative  
404 for the consumption of this essential fatty acid, since CLA is usually consumed through dairy  
405 and meat products. Thus, the cookies with CLA diversify and add value to products of goat  
406 origin and can help to produce a food with functional potential.

407

## 408 **Principal component analysis**

409 Figure 1 shows the graph resulting from Principal Component Analysis (PCA). The  
410 first two factors explain 90.03 % of the variance, allowing relevant discrimination of the  
411 samples as a function of the attributes evaluated, according to Piclin et al. (2008) and Nurgel et  
412 al. (2004) [43, 44]. The first factor (A) explained 56.29 % of the variance, being positively  
413 characterized by "b\*", "proteins", "sugars", "moisture", "ashes", "fibers", "Aw", "purchases",  
414 "SFA", "overall assessment" and "purchase intention", and negatively by "lipids", "MUFA" and  
415 "TFA". The second factor (B) explained 33.74 % of the total variance, relating positively to  
416 "L", and negatively by "texture", "ashes" and "PUFA".

417

418 **Fig 1. PCA of the data for physical-chemical, physical, sensory and chromatographic of**  
419 **the cookies.**

420 CVF (cookie with vegetable fat); CB (cookie with butter); CG (cookie with goat cream) and  
421 CGCLA (cookie with enriched goat cream with CLA).

422

423 It can be observed that the analysis was able to separate the samples according to  
424 similar characteristics, with the CVF formulation correlated with the monounsaturated fatty  
425 acids and trans fatty acids; CB was related to polyunsaturated fatty acids and ashes; the CG and  
426 CGCLA formulations obtained more attributes in common such as Aw, moisture, proteins,  
427 fibers, purchase intention and overall evaluation. CGCLA was correlated with CLA,  
428 considering that this formulation was the one that obtained the highest percentage of this PUFA.  
429 The principal components among the four formulations corroborate the data obtained in the  
430 analyzes described above.

431

## 432 **Conclusion**

433 The substitution of the hydrogenated vegetable fat and butter by goat cream in cookies  
434 is feasible, since it does not alter the flavor, maintaining the sensorial acceptance and improving  
435 the profile of fatty acids of the food, and increasing the levels of essential fatty acids like CLA.  
436 This fact raises the biological properties of this food and may increase the demand for this  
437 product by consumers seeking to eat tasty foods with functional potential.

## 438 **Acknowledgments**

439 This study was supported by Coordination of Improvement of Higher Level Personnel -  
440 CAPES.



## 441   **References**

- 442       1. Mohamed H, El-Salam ABD, El-Shibiny S. Conjugated linoleic acid and vaccenic  
443       acid contents in cheeses: An overview from the literature. *J. Food Compos. Anal.*  
444       2014; 33: 117–126.
- 445       2. Koba K, Yanagita T. Health benefits of conjugated linoleic acid (CLA). *Obes Res Clin*  
446       *Pract.* 2014; 8: 525-532.
- 447       3. Park Y, Pariza M, The bioactivities and potential mechanisms of action of the  
448       conjugated linoleic acid. *Food Sci Biotechnol.* 2009; 18: 586-593.
- 449       4. Lopez-Aliaga I, Alferez MJM, Nestares MT, Ros PB, Barrionuevo M, Campos MS.  
450       Goat milk feeding causes an increase in biliary secretion of cholesterol and a decrease  
451       in plasma cholesterol levels in rats. *J. Dairy Sci.* 2005; 88: 1024-1030.
- 452       5. Soares JKB, Melo APR, Medeiros, MAC, Queiroga RCRE, Bomfim MAD, et al.  
453       Anxiety behavior is reduced, and physical growth is improved in the progeny of rat  
454       dams that consumed lipids from goat milk: An elevated plus maze analysis. *Neurosci.*  
455       *Lett.* 2013; 552: 25– 29.
- 456       6. Assis POA, Guerra JCB, Araujo, DFS, Junior RFA, Machado TADG, Araujo AA, et  
457       al. Intestinal anti-inflammatory activity of goat milk and goat yoghurt in the acetic  
458       acid model of rat colitis. *Int Dairy J.* 2016; 56: 45-54.
- 459       7. Costa N, Cruz R, Graça P, Breda J, Casal S. Trans fatty acids in the Portuguese food  
460       market. *Food Control.* 2016; 64: 128-134.
- 461       8. Tarancón P, Fiszman SM, Salvador A, Tárrega A. Formulating biscuit with healthier  
462       fats. Consumer profiling of textural and flavor sensations during consumption. *Food*  
463       *Res. Int.* 2013; 53 (1): 134-140.

- 464 9. Pareyt B, Talhaoui F, Kerckhofs G, Brijs K, Goesaert H, et al. The role of sugar and  
465 fat in sugar-snap cookies: Structural and textural properties. *J Food Eng.* 2009; 90 (3)  
466 400-408.
- 467 10. Gökmen V, Serpen A, Açar OÇ, Morales FJ. Significance of furosine as eat-induced  
468 marker in cookies. *J Cereal Sci.* 2008; 48 (3): 843-847.
- 469 11. Bomfim MAD, Queiroga RCE, Aguila MB, Medeiros MC, Fisberg M, et al.  
470 Abordagem multidisciplinar de P,D&I para o desenvolvimento de produto lácteo  
471 caprino com alto teor de CLA e alegação de propriedade funcional. *R. Bras. de*  
472 *Zootec.* 2011; 40: 98-106.
- 473 12. Sukhija PS, Palmquist DL. Rapid method for determination of total fatty acid content  
474 and composition of feedstuffs and feces. *J Agric Food Chem.* 1988; v: 36 -1202-1206.
- 475 13. Palmquist DL, Jenkins TC. Challenges with fats and fatty acid methods. *J Anim Sci.*  
476 2003; 12: 3250-3254.
- 477 14. Commission International de L'eclairage (CIE): "Recommendations on Uniform  
478 Color Spaces, Color Difference Equations, Psychometric Color Terms". Supplement  
479 No. 2 to CIE Publication No. 15, Colorimetry, Bureau Central de la CIE, Paris, 1978.
- 480 15. Association of Official Agricultural Chemists. Official methods of analysis of  
481 Association of Official Agricultural Chemists. 19<sup>th</sup> ed., Ass. Off. Analytical. Chem.,  
482 Washington, USA. 2012.
- 483 16. Folch J, Lees M, Stanley GHS. A simple method for the isolation and purification of  
484 total lipids from animal tissues. *J Biol Chem.* 1957; 226: 497-509.
- 485 17. Dutcosky SD. Análise sensorial de alimentos. Curitiba: Champagnat, 4 ed; 2013.
- 486 18. Sigmapstat (programa de computador). Versão 3.1. 2009; Point Richmond (Califórnia):  
487 Comercial.

- 488 19. Faria EV, Yotsuyanagi K. Técnicas de Análise Sensorial, Campinas: ITAL/LAFISE,  
489 2002.
- 490 20. Lara E, Cortes P, Briones V, Perez M. Structural and physical modifications of corn  
491 biscuits during baking process. LWT. 2011; 44: 622–630.
- 492 21. Marques GA, Brilhante JFB, Silva DA, Silva EMN. Whey protein as a substitute for  
493 wheat in the development of no added sugar cookies. LWT. 2016; 67: 118-126.
- 494 22. Laguna L, Salvador A, Sanz T, Fiszman SM. Performance of a resistant starch rich  
495 ingredient in the baking and eating quality of short-dough biscuits. LWT. 2011; 44:  
496 737-746.
- 497 23. Sharma P, Gujral HS. Extrusion of hulled barley affecting b-glucan and properties of  
498 extrudates. Food Bioprocess Tech. 2013; 6: 1374-1389.
- 499 24. Bick MA, Fogaça AO. Cookies with different concentrations of quinoa flour in partial  
500 replacement of wheat flour. Braz. J. Food Technol. v. 17, n. 2, p. 121-129, 2014.
- 501 25. Peleg M, Normand MD. Symmetrized dot-patterns (SDP) of irregular compressive  
502 stress strain relationship. J. Texture Stud. 1992; 23: 427–438.
- 503 26. Umesha SS, Sai MR, Indiramma AR, Akshitha S, Naidu KA. Enrichment of biscuits  
504 with microencapsulated omega-3 fatty acid (Alpha-linolenic acid) rich Garden cress  
505 (*Lepidium sativum*) seed oil: Physical, sensory and storage quality characteristics of  
506 biscuits. LWT. 2015; 62: 654-661.
- 507 27. Bertolin TE, Centenaro A, Giacomelli B, Reinehr C, Gutkoski LC. Elaboration of  
508 biscuits with oatmeal and fat palm with added L-leucine and calcium for sarcopenia.  
509 LWT. 2013; 33: (2) 345-354.
- 510 28. Ripolles D, Parron JA, Calvo M, Perez MD, Fitzgerald RJ, et al. Antioxidant activity  
511 of co-products from milk fat processing and their enzymatic hydrolysates obtained  
512 with different proteolytic preparations. Int Dairy J. 2016; 60: 70-77.

- 513 29. Chung H, Cho A, Lim S. Utilization of germinated and heat-moisture treated brown  
514 rices in sugar-snap cookies. *LWT*. 2014; 57: 260 - 266.
- 515 30. Arimi JM, Duggan E, O'sullivan M, Lyng JG, O'riordan ED. Effect of water activity  
516 on the crispiness of a biscuit (Crackerbread): Mechanical and acoustic evaluation.  
517 *Food Res. Int.* 2010; 43:1650-1655.
- 518 31. Laguna L, Primo-martín C, Varela P, Salvador A, Sanz T. HPMC and inulin as fat  
519 replacers in biscuits: Sensory and instrumental evaluation. *LWT*. 2014; 56: 494-501.
- 520 32. Biguzzi C, Schlich P, Lange C. The impact of sugar and fat reduction on perception  
521 and liking of biscuits. *Food Qual Prefer.* 2014; 35: 41–47.
- 522 33. Drewnowski A, Nordensten K, Dwyer J. Replacing sugar and fat in cookies: Impact  
523 on product quality and preference. *Food Qual Prefer.* 1998; 9: 13–20.
- 524 34. Santos LAT, Cruz R, Casal, S. Trans fatty acids in commercial cookies and biscuits:  
525 An update of Portuguese Market. *Food Control.* 2015; 47:141-146.
- 526 35. Gomes LC, Alcalde CR, Santos GT, Feihrmann AC, Molina BSL. et al. Concentrate  
527 with calcium salts of fatty acids increases the concentration of polyunsaturated fatty  
528 acids in milk produced by dairy goats. *Small Rumin. Res.* 2015; 124: 81–88.
- 529 36. Ruiz-Nunez BDA, Dijck-Brouwer J, Muskiet FAJ. The relation of saturated fatty acids  
530 with low-grade inflammation and cardiovascular disease. *J. Nutri. Biochem.* 2016;  
531 36: 1-20.
- 532 37. Gómez-Cortés P, Juárez M, Fuente MA. Milk fatty acids and potential health benefits:  
533 An updated vision. *Trends Food Sci Technol.* 2018; 81: 1-9.
- 534 38. Ganguly R, Pierce GN. The toxicity of dietary trans fats. *Food Chem Toxicol.* 2015;  
535 78: 170–176.

- 536 39. Ganguly R, Lavallee R, Maddaford TG, Devaney B, Bassett CMC, et al. Ruminant  
537 and industrial trans-fatty acid uptake in the heart. *J. Nutrit. Biochem.*2016; 31: 60–  
538 66.
- 539 40. Park Y. Conjugated linoleic acid (CLA): Good or bad trans fat?. *J Food Composit*  
540 *Anal.* 2009; 22: 4–12.
- 541 41. Mele MC, Cannelli G, Carta G, Cordeddu L, Melis MP, et al. Metabolism of c9,t11-  
542 conjugated linoleic acid (CLA) in humans. *Prostaglandins Leukot. Essent. Fatty*  
543 *Acids.* 2013; 89: 115–119.
- 544 42. Razzaghia A, Naseriana AA, Valizadeha R, Ebrahimia SH.; Khorramia B, et al.  
545 Pomegranate seed pulp, pistachio hulls, and tomato pomace as replacement of wheat  
546 bran increased milk conjugated linoleic acid concentrations without adverse effects on  
547 ruminal fermentation and performance of Saanen dairy goats. *Anim Feed Sci Technol.*  
548 2015; 210: 46-55.
- 549 43. Piclin N, Pintore M, Lanza CM, Scacco A, Guccione S, et al. Sensory analysis of red  
550 wines: discrimination by adaptive fuzzy partition. *J Sens Stud.* 2008; 23: 58-569.
- 551 44. Nurgel C, Pickering GJ, Inglis DL. Sensory and chemical characteristics of Canadian  
552 ice wines. *J Sci Agric.* 2004; 84: 1675- 1684.

553

## 554 **Supporting information**

555 **S1 Table. Fatty acid profile present in fats in percentage.** <sup>a</sup> VF: vegetable fat; <sup>b</sup> B: butter, <sup>c</sup>  
556 G: goat cream; <sup>d</sup> GCLA: goat cream with CLA, expressed as a percentage.

557 **S2 Table. Ingredients used in the formulations of cookies for 100 g of fresh dough.** <sup>a</sup> CVF  
558 - vegetable fat; <sup>b</sup> CB - butter; <sup>c</sup> CG - goat cream; <sup>d</sup> CGCLA - goat cream with CLA.

559 **S3 Table. Physical parameters of cookies with different lipid sources.** Means  $\pm$  standard  
560 deviation with different letters on the same line differed by Tukey's test ( $p < 0.05$ ). CVF - vegetable  
561 fat; CB - butter; CG - goat cream; CGCLA - goat cream with CLA.

562 **S4 Table. Physico-chemical parameters of cookies made with different lipid sources.** Averages  
563  $\pm$  standard deviation with different letters on the same line differed by Tukey's test ( $p < 0.05$ ). CVF  
564 - vegetable fat; CB - butter; CG - goat cream; CGCLA - goat cream with CLA.

565 **S5 Table. Mean values of sensory acceptance and purchase intention tests.** Averages  $\pm$   
566 standard deviation with different letters on the same line differed by Tukey's test ( $p < 0.05$ ). CVF  
567 - vegetable fat; CB - butter; CG - goat cream; CGCLA - goat cream with CLA.

568 **S6 Table. Distribution of the scores according to the order of general preference by the**  
569 **tasters (n = 123) in the sensory analysis of cookies.** \* 1 = least preferred, 4 = most  
570 preferred.

571 \*\* Sum of the orders of each sample = (1 x number of tasters) + (2 x number of tasters) + (3  
572 x number of tasters) + (4 x number of tasters).

573 CGV - Vegetable fat; CM - Butter; Caprine CNCLA - Goat cream enriched with CLA).

574 **S7 Table. Profile of fatty acids present in cookies in percentage.** <sup>a</sup> CGV (cookie with  
575 vegetable fat); <sup>b</sup> CB (cookie with butter); <sup>c</sup> CG (cookie with goat cream); <sup>d</sup> CGCLA (cookie  
576 with goat cream enriched with CLA).

577 **S1 Fig. PCA of the data for physical-chemical, physical, sensory and chromatographic of**  
578 **the cookies.** CVF (cookie with vegetable fat), CB (cookie with butter), CG (cookie with goat  
579 cream) and CGCLA (cookie with enriched goat cream with CLA).

580

581

582

583

Biplot (eixos Factor A e Factor B: 90,03 %)

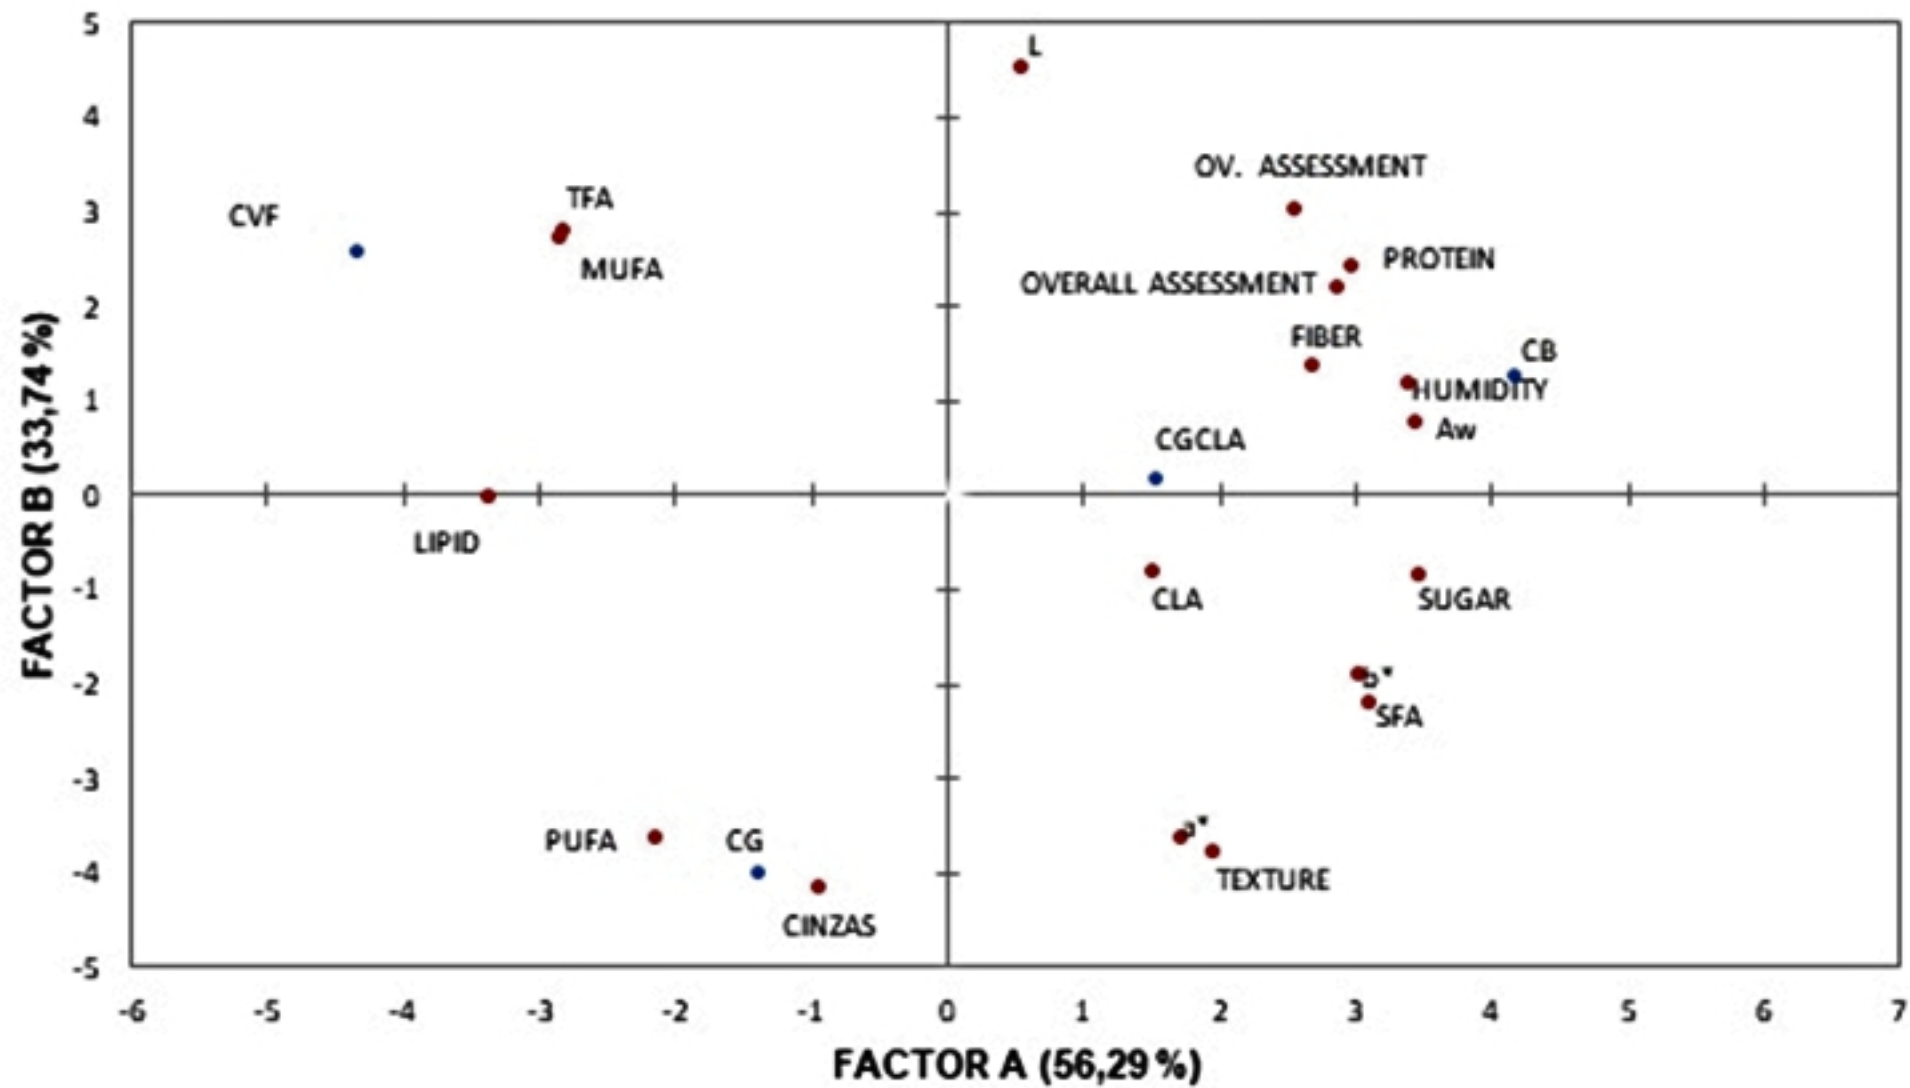

Figure
